# Supplementary material for: Striatal Interneurons in Transgenic Nonhuman Primate Model of Huntington’s Disease
Source: PubMed Central journal article supplement (PMC6401084; doi:10.1038/s41598-019-40165-w), 2019-03-05
Supplement: 41598_2019_40165_MOESM1_ESM.pdf [file 41598_2019_40165_MOESM1_ESM.pdf]

# **Striatal Interneurons in Transgenic Nonhuman Primate Model of Huntington's Disease**

Shoeb B. Lallani<sup>1,3</sup>, Rosa M. Villalba<sup>3,4</sup>, Yiju Chen<sup>1,3</sup>, Yolanda Smith<sup>2,3,4\*</sup>, Anthony W.S. Chan<sup>1,3\*</sup>

<sup>1</sup>Department of Human Genetics and <sup>2</sup>Department of Neurology, Emory University School of Medicine,  
<sup>3</sup>Division of Neuropharmacology and Neurological Diseases, Yerkes National Primate Research Center,  
Atlanta, GA, USA, <sup>4</sup>UDALL Center for Excellence for Parkinson's Disease, Emory University, Atlanta,  
GA, USA

**SUPPLEMENTARY MATERIAL**

### Supplementary Material

|             |                  | <b>CR+</b>                |                        | <b>PV+</b>                |                        | <b>ChAT+</b>              |                        |
|-------------|------------------|---------------------------|------------------------|---------------------------|------------------------|---------------------------|------------------------|
|             |                  | <i>Number of sections</i> | <i>Interval Number</i> | <i>Number of sections</i> | <i>Interval Number</i> | <i>Number of sections</i> | <i>Interval Number</i> |
| <b>rWT1</b> | Pre-Commissural  | 8                         | 1/15                   | 8                         | 1/15                   | 6                         | 1/24                   |
|             | Post-Commissural | 16                        | 1/15                   | 16                        | 1/15                   | 11                        | 1/24                   |
| <b>rHD7</b> | Pre-Commissural  | 6                         | 1/24                   | 5                         | 1/24                   | 15                        | 1/12                   |
|             | Post-Commissural | 8                         | 1/24                   | 7                         | 1/24                   | 19                        | 1/12                   |
| <b>rHD1</b> | Pre-Commissural  | 5                         | 1/24                   | 4                         | 1/24                   | 9                         | 1/12                   |
|             | Post-Commissural | 7                         | 1/24                   | 5                         | 1/24                   | 13                        | 1/12                   |

*Supplemental Table 1. Number of Sections and Serial Section Interval Number*

The number of sections that were stained with each immunomarker and the serial section interval number for each immunomarker and NHP.

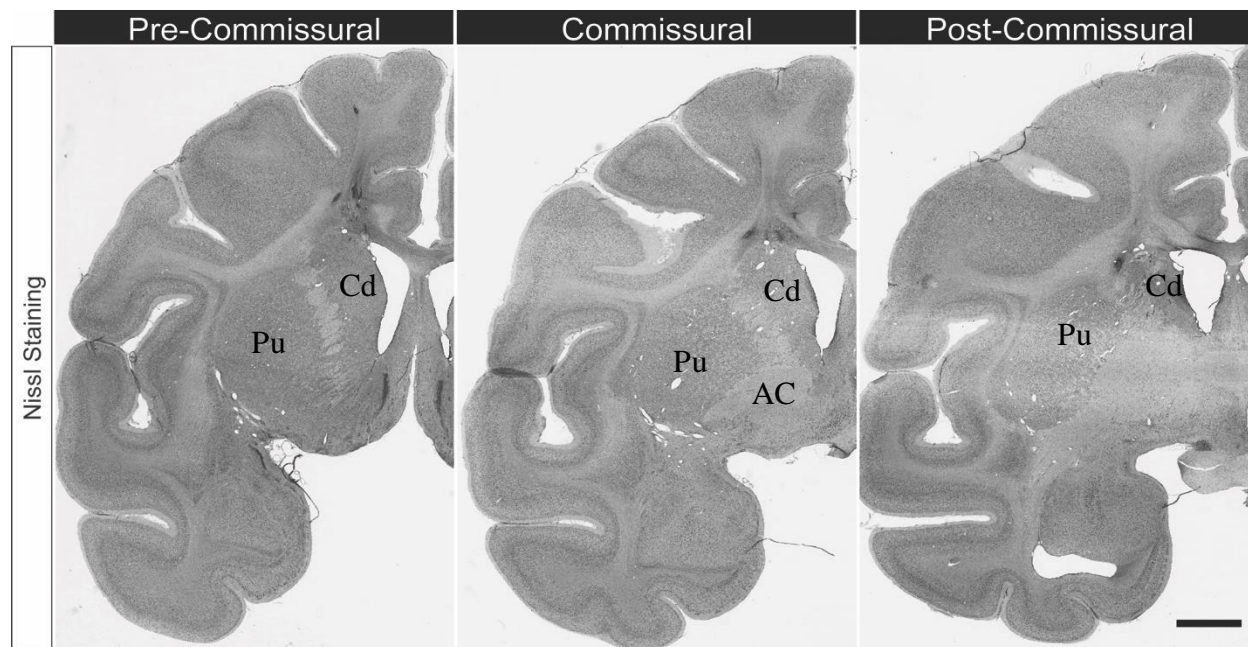

*Supplemental Figure 1. Pre- and Post-Commissural Regions*

Scanned images of Nissl-stained coronal brain sections (50 $\mu$ m) depicting the striatal ROIs – the caudate nucleus (Cd) and putamen (Pu). The middle micrograph shows the anterior commissure (AC), which is used as the landmark that distinguishes the head (anterior to AC) from the body (posterior to AC) of the caudate nucleus, and the pre- from the post-commissural regions of the putamen. The scale bar represents 5mm.

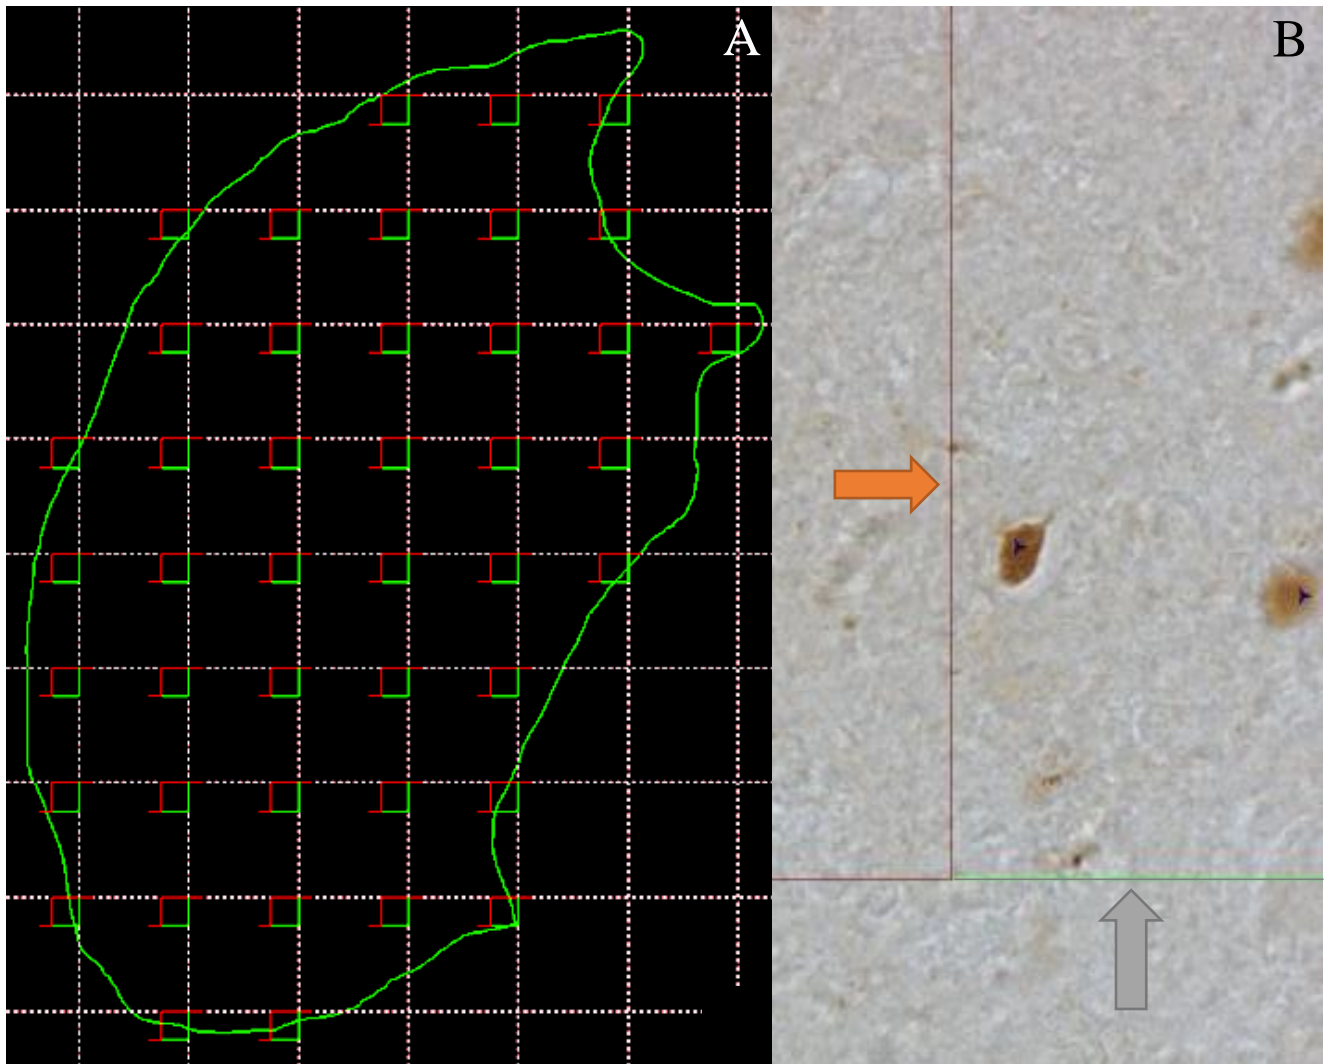

*Supplemental Figure 2. Stereology*

(A) Optical fractionator grid (white lines) and counting probes (red and green squares) at 2.5x. The ROI is traced in green. (B) The stereology probe under 40x oil-immersion. Depicted are the acceptance (green) and rejection (red) lines.

| <b>Target</b> | <b>Grid/Probe</b> | <b>Caudate Nucleus</b>                  | <b>Putamen</b>                          |
|---------------|-------------------|-----------------------------------------|-----------------------------------------|
| CR            | Grid              | 700 $\mu\text{m}$ x 700 $\mu\text{m}$   | 1200 $\mu\text{m}$ x 1200 $\mu\text{m}$ |
|               | Probe             | 300 $\mu\text{m}$ x 300 $\mu\text{m}$   | 300 $\mu\text{m}$ x 300 $\mu\text{m}$   |
| PV            | Grid              | 700 $\mu\text{m}$ x 700 $\mu\text{m}$   | 800 $\mu\text{m}$ x 800 $\mu\text{m}$   |
|               | Probe             | 300 $\mu\text{m}$ x 300 $\mu\text{m}$   | 400 $\mu\text{m}$ x 400 $\mu\text{m}$   |
| ChAT          | Grid              | 1400 $\mu\text{m}$ x 1400 $\mu\text{m}$ | 1400 $\mu\text{m}$ x 1400 $\mu\text{m}$ |
|               | Probe             | 600 $\mu\text{m}$ x 600 $\mu\text{m}$   | 600 $\mu\text{m}$ x 600 $\mu\text{m}$   |

*Supplemental Table 2. Optical Fractionator Grid and Counting Probe Size*

The optical fractionator grid and counting probe size. The dimensions were chosen to maximize efficiency and minimize the CE.

|              | <b>Caudate Nucleus</b> |                              |                       |                              | <b>Putamen</b>         |                              |                         |                              |
|--------------|------------------------|------------------------------|-----------------------|------------------------------|------------------------|------------------------------|-------------------------|------------------------------|
|              | <i>Head</i>            |                              | <i>Body</i>           |                              | <i>Pre-Commissural</i> |                              | <i>Post-Commissural</i> |                              |
|              | Estimated Total Cells  | Percent Difference from rWT1 | Estimated Total Cells | Percent Difference from rWT1 | Estimated Total Cells  | Percent Difference from rWT1 | Estimated Total Cells   | Percent Difference from rWT1 |
| Nissl+ cells |                        |                              |                       |                              |                        |                              |                         |                              |
| rWT1         | 7.85E+06               | -                            | 4.92E+06              | -                            | 1.06E+07               | -                            | 9.58E+06                | -                            |
| rHD7         | 3.77E+06               | -52.0%                       | 1.84E+06              | -62.6%                       | 3.51E+06               | -67.0%                       | 3.09E+06                | -67.7%                       |
| rHD1         | 1.60E+06               | -80.0%                       | 1.28E+06              | -74.0%                       | 1.48E+06               | -86.1%                       | 1.50E+06                | -84.3%                       |
| CR+ cells    |                        |                              |                       |                              |                        |                              |                         |                              |
| rWT1         | 4.01E+05               | -                            | 2.83E+05              | -                            | 2.26E+05               | -                            | 4.43E+05                | -                            |
| rHD7         | 4.43E+05               | +10.5%                       | 2.21E+05              | -21.9%                       | 2.45E+05               | +8.4%                        | 3.30E+05                | -25.5%                       |
| rHD1         | 3.35E+05               | -16.5%                       | 1.63E+05              | -42.4%                       | 2.26E+05               | 0%                           | 2.46E+05                | -44.5%                       |
| PV+ cells    |                        |                              |                       |                              |                        |                              |                         |                              |
| rWT1         | 1.27E+05               | -                            | 1.72E+05              | -                            | 1.24E+05               | -                            | 4.74E+05                | -                            |
| rHD7         | 6.79E+04               | -56.3%                       | 3.50E+04              | -75.2%                       | 8.37E+04               | -32.5%                       | 1.72E+05                | -63.7%                       |
| rHD1         | 5.55E+04               | -46.5%                       | 4.27E+04              | -79.7%                       | 1.14E+05               | -8.1%                        | 2.90E+05                | -38.8%                       |
| ChAT+ cells  |                        |                              |                       |                              |                        |                              |                         |                              |
| rWT1         | 8.52E+04               | -                            | 8.78E+04              | -                            | 1.10E+05               | -                            | 2.60E+05                | -                            |
| rHD7         | 9.49E+04               | +11.4%                       | 3.84E+04              | -56.3%                       | 5.75E+04               | -47.7%                       | 3.01E+04                | -88.4%                       |
| rHD1         | 1.08E+05               | +26.8%                       | 7.73E+04              | -11.9%                       | 8.31E+04               | -24.5%                       | 1.32E+05                | -49.2%                       |

*Supplemental Table 3. Striatal Cell Counts and Percent Difference*

Estimated total stereological counts for each interneuron and percent difference from rWT1 (control). Negative percentages indicate a lower number relative to the control, while a positive percentage indicates a higher number relative to the control.

|      | <b>Caudate Nucleus</b>                    |                              |                                           |                              | <b>Putamen</b>                            |                              |                                           |                              |
|------|-------------------------------------------|------------------------------|-------------------------------------------|------------------------------|-------------------------------------------|------------------------------|-------------------------------------------|------------------------------|
|      | <i>Head</i>                               |                              | <i>Body</i>                               |                              | <i>Pre-Commissural</i>                    |                              | <i>Post-Commissural</i>                   |                              |
|      | Estimated Total Volume (mm <sup>3</sup> ) | Percent Difference from rWT1 | Estimated Total Volume (mm <sup>3</sup> ) | Percent Difference from rWT1 | Estimated Total Volume (mm <sup>3</sup> ) | Percent Difference from rWT1 | Estimated Total Volume (mm <sup>3</sup> ) | Percent Difference from rWT1 |
| rWT1 | 142.0                                     | -                            | 136.1                                     | -                            | 133.6                                     | -                            | 495.6                                     | -                            |
| rHD7 | 214.9                                     | +51.4%                       | 112.1                                     | -17.6%                       | 226.8                                     | +69.8%                       | 377.4                                     | -23.9%                       |
| rHD1 | 107.4                                     | -24.3%                       | 45.3                                      | -66.7%                       | 102.6                                     | -23.2%                       | 188.6                                     | -61.9%                       |

*Table 4. Striatal Volume and Percent Difference*

Estimated striatal volume determined for the Nissl-stained sections and percent difference from rWT1 (control). Negative percentages indicate a lower volume relative to the control, while a positive percentage indicates a higher volume relative to the control.

|               | <b>Caudate Nucleus</b>                       |                              |                                              |                              | <b>Putamen</b>                               |                              |                                              |                              |
|---------------|----------------------------------------------|------------------------------|----------------------------------------------|------------------------------|----------------------------------------------|------------------------------|----------------------------------------------|------------------------------|
|               | <i>Head</i>                                  |                              | <i>Body</i>                                  |                              | <i>Pre-Commissural</i>                       |                              | <i>Post-Commissural</i>                      |                              |
|               | Estimated Total Density (n/mm <sup>3</sup> ) | Percent Difference from rWT1 | Estimated Total Density (n/mm <sup>3</sup> ) | Percent Difference from rWT1 | Estimated Total Density (n/mm <sup>3</sup> ) | Percent Difference from rWT1 | Estimated Total Density (n/mm <sup>3</sup> ) | Percent Difference from rWT1 |
| CR+ density   |                                              |                              |                                              |                              |                                              |                              |                                              |                              |
| rWT1          | 2.83E+03                                     | -                            | 2.08E+03                                     | -                            | 2.20E+03                                     | -                            | 8.94E+02                                     | -                            |
| rHD7          | 2.06E+03                                     | -27.1%                       | 1.97E+03                                     | -5.4%                        | 1.08E+03                                     | -50.9%                       | 8.49E+02                                     | -5.1%                        |
| rHD1          | 3.14E+03                                     | +10.9%                       | 3.60E+03                                     | +73.1%                       | 1.69E+03                                     | -23.0%                       | 1.31E+03                                     | +45.8%                       |
| PV+ density   |                                              |                              |                                              |                              |                                              |                              |                                              |                              |
| rWT1          | 8.95E+02                                     | -                            | 1.27E+03                                     | -                            | 1.21E+03                                     | -                            | 9.57E+02                                     | -                            |
| rHD7          | 3.16E+02                                     | -64.7%                       | 3.14E+02                                     | -75.2%                       | 3.69E+02                                     | -69.4%                       | 4.57E+02                                     | -52.2%                       |
| rHD1          | 5.16E+02                                     | -42.4%                       | 9.42E+02                                     | -25.6%                       | 8.57E+02                                     | -29.0%                       | 1.54E+03                                     | +60.6%                       |
| ChAT+ density |                                              |                              |                                              |                              |                                              |                              |                                              |                              |
| rWT1          | 7.62E+02                                     | -                            | 6.45E+02                                     | -                            | 1.07E+03                                     | -                            | 5.25E+02                                     | -                            |
| rHD7          | 4.41E+02                                     | -42.1%                       | 3.42E+02                                     | -47.0%                       | 2.53E+02                                     | -76.4%                       | 7.98E+01                                     | -84.8%                       |
| rHD1          | 7.92E+02                                     | +4.0%                        | 1.71E+03                                     | +164.4%                      | 6.22E+02                                     | -42.0%                       | 6.98E+02                                     | +33.1%                       |

*Supplemental Table 5. Striatal Density and Percent Difference*

Density of each interneuron type and percent difference from rWT1 (control). Negative percentages indicate a lower number relative to the control, while a positive percentage indicates a higher number relative to the control. n = estimated number of neurons.
